# Supplementary material for: Acupuncture for Adults with Diarrhea-Predominant Irritable Bowel Syndrome or Functional Diarrhea: A Systematic Review and Meta-Analysis
Source: Hindawi journal article supplement (doi:10.1155/2020/8892184), 2020-11-22
Supplement: f2 [file 8892184.f2.pdf]

PubMed

- #1 "Acupuncture"[Mesh]
- #2 "Acupuncture Therapy"[Mesh]
- #3 "Acupuncture Analgesia"[Mesh]
- #4 "Acupuncture, Ear"[Mesh]
- #5 "Electroacupuncture"[Mesh]
- #6 "Meridians"[Mesh]
- #7 "Acupuncture Points"[Mesh]
- #8 "Moxibustion"[Mesh]
- #9 acupuncture[Title/Abstract]
- #10 need\*[Title/Abstract]
- #11 stimulat\*[Title/Abstract]
- #12 eletroacupuncture[Title/Abstract]
- #13 point\*[Title/Abstract]
- #14 prick\*[Title/Abstract]
- #15 meridians[Title/Abstract]
- #16 micmeridians[Title/Abstract]
- #17 collaterals[Title/Abstract]
- #18 channels[Title/Abstract]
- #19 jingluo[Title/Abstract]
- #20 ching lo[Title/Abstract]
- #21 jing luo[Title/Abstract]
- #22 taiyi moxa-cigar[Title/Abstract]
- #23 auriculotherapy
- #24 OR/1-23
- #25 "Diarrhea"[Mesh]
- #26 diarrhoea[Title/Abstract]
- #27 diarrhea[Title/Abstract]
- #28 OR/25-27
- #29 "Clinical Trials, Phase II as Topic"[Mesh] OR "Clinical Trials, Phase III as Topic"[Mesh] OR "Clinical Trials, Phase IV as Topic"[Mesh] OR "Controlled Clinical Trials as Topic"[Mesh] OR "Randomized Controlled Trials as Topic"[Mesh] OR "Intention to Treat Analysis"[Mesh]
- #30 "Pragmatic Clinical Trials as Topic"[Mesh] OR "Clinical Trials, Phase II"[Publication Type] OR "Clinical Trials, Phase III"[Publication Type] OR "Clinical Trials, Phase IV"[Publication Type] OR "Controlled Clinical Trials"[Publication Type] OR "Randomized Controlled Trials"[Publication Type] OR "Pragmatic Clinical Trials as Topic"[Publication Type]
- #31 "Single-Blind Method"[Mesh] OR "Double-Blind Method"[Mesh]
- #32 random\*[Title/Abstract] OR blind\*[Title/Abstract] OR singleblind\*[Title/Abstract] OR doubleblind\*[Title/Abstract] OR trebleblind\*[Title/Abstract] OR tripleblind\*[Title/Abstract]
- #33 OR/29-32
- #34 AND/24,28,33
